# Supplementary material
Source: HighWire-hosted journal article supplement (https://bmjopen.bmj.com/content/8/6/e020874)
Supplement: inline-supplementary-material-1 [file inline-supplementary-material-1.pdf]

Web appendix table: Events, person years (PY) and incidence rate (Events per 1000 person years (PY)) for women and men within the first year and subsequent years of diagnosis

| Variables                                             | Women      |        |     |                  |         |     | Men        |       |     |                  |        |     |
|-------------------------------------------------------|------------|--------|-----|------------------|---------|-----|------------|-------|-----|------------------|--------|-----|
|                                                       | First year |        |     | Subsequent years |         |     | First year |       |     | Subsequent years |        |     |
|                                                       | Events     | PY     | IR  | Events           | PY      | IR  | Events     | PY    | IR  | Events           | PY     | IR  |
| <b><i>Physical chronic diseases</i></b>               |            |        |     |                  |         |     |            |       |     |                  |        |     |
| <i>Chronic infection</i>                              | 9          | 74     | 122 | 52               | 455     | 114 | 3          | 53    | 56  | 52               | 291    | 178 |
| <i>Cancer</i>                                         | 941        | 1,729  | 544 | 1,361            | 9,845   | 138 | 199        | 436   | 456 | 193              | 1,895  | 102 |
| <i>Benign hematologic d. incl. anemia</i>             | 69         | 372    | 185 | 294              | 2,296   | 128 | 16         | 76    | 210 | 33               | 366    | 90  |
| <i>D. of the thyroid gland</i>                        | 280        | 2,433  | 115 | 1,699            | 15,394  | 110 | 17         | 174   | 98  | 84               | 969    | 87  |
| <i>Diabetes</i>                                       | 138        | 1,091  | 126 | 784              | 5,718   | 137 | 78         | 780   | 100 | 506              | 3,821  | 132 |
| <i>Other Endocrine d. &amp; malnutrition</i>          | 63         | 329    | 191 | 213              | 1,642   | 130 | 15         | 62    | 241 | 39               | 291    | 134 |
| <i>Obesity</i>                                        | 321        | 1,596  | 201 | 1,682            | 10,046  | 167 | 35         | 266   | 132 | 188              | 1285   | 146 |
| <i>Neurological d.</i>                                | 600        | 4,104  | 146 | 3,728            | 30,093  | 124 | 138        | 818   | 169 | 515              | 4,543  | 113 |
| <i>Paraplegia &amp; hemiplegia</i>                    | 4          | 10     | 399 | 14               | 69      | 203 | 2          | 6     | 323 | 2                | 18     | 112 |
| <i>Eye d.</i>                                         | 205        | 1,143  | 179 | 580              | 5,233   | 111 | 72         | 518   | 139 | 221              | 2,250  | 98  |
| <i>D. of the ear</i>                                  | 161        | 1,174  | 137 | 791              | 6,515   | 121 | 71         | 658   | 108 | 270              | 3,181  | 85  |
| <i>Hypertension</i>                                   | 965        | 8,244  | 117 | 5,441            | 45,364  | 120 | 419        | 3,652 | 115 | 1,773            | 18,59  | 95  |
| <i>Ischemic heart d. &amp; heart failure</i>          | 271        | 1,236  | 219 | 831              | 4,981   | 167 | 305        | 1,087 | 281 | 599              | 5,003  | 120 |
| <i>Cardiac Arrhythmia &amp; valve d.</i>              | 163        | 929    | 175 | 626              | 4,918   | 127 | 85         | 461   | 185 | 245              | 2,139  | 115 |
| <i>Stroke</i>                                         | 168        | 412    | 408 | 297              | 2,082   | 143 | 95         | 226   | 420 | 111              | 949    | 117 |
| <i>Vascular d.</i>                                    | 80         | 379    | 211 | 309              | 1,972   | 157 | 57         | 216   | 264 | 136              | 934    | 146 |
| <i>Chronic pulmonary d. incl. asthma</i>              | 425        | 447    | 95  | 5,348            | 41,501  | 129 | 126        | 1,205 | 105 | 917              | 9,584  | 96  |
| <i>Inflammatory bowel d.</i>                          | 149        | 930    | 160 | 732              | 5,513   | 133 | 48         | 329   | 146 | 225              | 1,780  | 126 |
| <i>D. of the liver</i>                                | 43         | 260    | 165 | 196              | 1,145   | 171 | 17         | 108   | 158 | 100              | 645    | 155 |
| <i>D. of the skin</i>                                 | 435        | 6,022  | 72  | 6,288            | 57,36   | 110 | 154        | 2,076 | 74  | 1,440            | 17,008 | 85  |
| <i>Inflammatory rheumatic d.</i>                      | 355        | 1,542  | 230 | 1,306            | 8,335   | 157 | 137        | 811   | 169 | 548              | 4599   | 119 |
| <i>Degenerative rheumatic d. incl. osteoarthritis</i> | 2,360      | 8,380  | 282 | 7,167            | 46,627  | 154 | 607        | 3,032 | 200 | 2,044            | 18,327 | 112 |
| <i>Osteoporosis</i>                                   | 234        | 1,669  | 140 | 647              | 5,632   | 115 | 20         | 108   | 185 | 69               | 533    | 130 |
| <i>Chronic Pain</i>                                   | 1,553      | 12,506 | 124 | 17,339           | 109,917 | 158 | 521        | 4,336 | 120 | 4,547            | 35,258 | 129 |
| <i>Chronic Pain*</i>                                  | 130        | 2,064  | 63  | 1072             | 15,725  | 68  | 42         | 838   | 50  | 324              | 5843   | 55  |
| <i>D. of the kidney</i>                               | 89         | 358    | 249 | 358              | 2,218   | 161 | 33         | 145   | 227 | 112              | 806    | 139 |

Web appendix table: Events, person years (PY) and incidence rate (Events per 1000 person years (PY)) for women and men within the first year and subsequent years of diagnosis

| Variables                       | Women      |       |     |                  |        |     | Men        |       |     |                  |       |     |
|---------------------------------|------------|-------|-----|------------------|--------|-----|------------|-------|-----|------------------|-------|-----|
|                                 | First year |       |     | Subsequent years |        |     | First year |       |     | Subsequent years |       |     |
|                                 | Events     | PY    | IR  | Events           | PY     | IR  | Events     | PY    | IR  | Events           | PY    | IR  |
| <i>Gynecological d.</i>         | 113        | 501   | 226 | 536              | 3,925  | 137 | .          | .     | .   | .                | .     | .   |
| <b><i>Mental conditions</i></b> |            |       |     |                  |        |     |            |       |     |                  |       |     |
| <i>Dementia</i>                 | 10         | 64    | 156 | 36               | 267    | 135 | 5          | 24    | 211 | 10               | 81    | 123 |
| <i>Substance abuse</i>          | 103        | 358   | 288 | 522              | 1,967  | 265 | 62         | 309   | 201 | 364              | 2,011 | 181 |
| <i>Schizophrenia</i>            | 9          | 57    | 157 | 40               | 270    | 148 | 4          | 23    | 174 | 11               | 204   | 54  |
| <i>Depression and anxiety</i>   | 979        | 5,008 | 195 | 6,523            | 34,403 | 190 | 210        | 1,115 | 188 | 1,095            | 7,247 | 151 |
| <i>Eating disorders</i>         | 5          | 32    | 156 | 59               | 416    | 142 | .          | .     | .   | .                | .     | .   |
| <i>Personality disorders</i>    | 46         | 177   | 260 | 339              | 1,677  | 202 | 8          | 47    | 172 | 63               | 435   | 145 |

Events: Incidence of LTSA

\*chronic pain with no other chronic comorbidities
